# Supplementary material for: Transcriptome Analysis of the Toxic Effects of Amisulbrom and Isoflucypram on Zebrafish (Danio rerio) Larvae
Source: MDPI journal article supplement (doi:10.3390/w14020272), 2022-01-17
Supplement: s1 [file s1]

**Table S1.** The primers used for quantitative real-time PCR.

| Gene Name              | Primer Sequence                                                        | GenBank ID     |
|------------------------|------------------------------------------------------------------------|----------------|
| <i>saga</i>            | F:5'-TCATGGTGTCTTACAGAGTTGTTGT-3'<br>R:5'-TGAACCTCTCAAATACCATTTCTTC-3' | NM_200559.2    |
| <i>gnat1</i>           | F:5'-TGGAGTTCATTGTCATCATCTACAG-3'<br>R:5'-ATCCTTCCACAACCTCAGGATAAT-3'  | AY050499.1     |
| <i>gnat2</i>           | F:5'-TTCGATCTATTATTTTGGCAACAT-3'<br>R:5'-GTA CTGGCAGCTCTATCAAAAAG-3'   | AY050500.1     |
| <i>grk7a</i>           | F:5'-ATCGTGTATCGTGACATGAAGC-3'<br>R:5'-TATATCCAGCCACCATTTTCATAGAT-3'   | NM_001031841.3 |
| <i>cyp8b1</i>          | F:5'-GGTGGAAGAAGCTCAAGTATTACA-3'<br>R:5'-GTATCTGAACTGGATGTCTCGATCT-3'  | NM_001003736.1 |
| <i>si:dkey-91i10.3</i> | F:5'-ATATGGGCCATTGGTTATTGTAAA-3'<br>R:5'-TTAATAGCATTGGTGTAGTTGGACA-3'  | NM_001123277.1 |
| <i>cyp7a1</i>          | F:5'-GTCGCTATACTTTGGGCTTCAC-3'<br>R:5'-GCCTCTTTAATGATGCTGTCTAAAA-3'    | NM_201173.2    |
| <i>afp4</i>            | F:5'-CACGCGTCCGAACAATCTC-3'<br>R:5'-CTCAACATTCTTCAGATTGTCCACT-3'       | NM_001045488.1 |
| <i>acox1</i>           | F:5'-GAAGACCTAAACTTTCTCTCTCGAA-3'<br>R:5'-TCAGCAGTACACTGGCTTTTAAAG-3'  | XM_005166165.4 |
| <i>acsbg2</i>          | F:5'-TGAGTCATCAGAGGAAGAATCTG-3'<br>R:5'-CTGATTTACAGTAAGAGGGGTTTCA-3'   | XM_005166789.4 |
| <i>rcorn3</i>          | F:5'-GTTACGTCACAAAACCTGAAGTGAT-3'<br>R:5'-AAAAACTCGCGTTATAGGATAATGA-3' | NM_200825.2    |
| <i>hmgcs1</i>          | F:5'-TTATTACACGAACCAACACCGTTAT-3'<br>R:5'-ACTGTCAAGCACAGAGAGTTGATGT-3' | NM_201085.2    |
| <i>fabp3</i>           | F:5'-AGAATTCGATGAGTACATGAAAGG-3'<br>R:5'-AAATTGATTTCTGTGGATTTGAAAG-3'  | NM_152961.3    |
| <i>angptl4</i>         | F:5'-GGATGAATAAGCTGGAAGAAAAAGT-3'<br>R:5'-TCGTTTTTCATCGTAATCTGATTTT-3' | XM_043217489.1 |
